# Supplementary material for: Insecticide-Mediated Shift in Ecological Dominance between Two Competing Species of Grain Beetles
Source: PubMed Central journal article supplement (PMC4069159; doi:10.1371/journal.pone.0100990), 2014-06-24
Supplement: pone.0100990.s001.pdf [file pone.0100990.s001.pdf]

Fig. 4a

| S. zeamais | R. dominica | S. zeamais ri |
|------------|-------------|---------------|
| 20         | 0           | 0.0224        |
| 20         | 0           | 0.0319        |
| 20         | 0           | 0.0273        |
| 20         | 0           | 0.0265        |
| 50         | 0           | 0.0224        |
| 50         | 0           | 0.0225        |
| 50         | 0           | 0.0225        |
| 50         | 0           | 0.0141        |
| 100        | 0           | 0.017         |
| 100        | 0           | 0.0147        |
| 100        | 0           | 0.0142        |
| 100        | 0           | 0.0133        |
| 150        | 0           | 0.0114        |
| 150        | 0           | 9.88E-03      |
| 150        | 0           | 0.0189        |
| 150        | 0           | 0.0159        |
| 200        | 0           | 0.0144        |
| 200        | 0           | 0.0111        |
| 200        | 0           | 0.0106        |
| 200        | 0           | 9.84E-03      |
| 5          | 100         | 0.0374        |
| 10         | 100         | 0.0319        |
| 15         | 100         | 0.0239        |
| 20         | 1400        | 0.025         |
| 40         | 2300        | 0.0212        |
| 60         | 800         | 0.0214        |
| 150        | 1200        | 9.03E-03      |
| 200        | 200         | -2.34E-03     |
| 270        | 600         | 7.26E-03      |
| 200        | 0           | 0.0178        |
| 200        | 0           | 0.0163        |
| 200        | 0           | 0.0169        |
| 150        | 50          | 0.0221        |
| 150        | 50          | 0.0208        |
| 150        | 50          | 0.0217        |
| 100        | 100         | 0.0229        |
| 100        | 100         | 0.026         |
| 100        | 100         | 0.0231        |
| 50         | 150         | 0.0271        |
| 50         | 150         | 0.0311        |
| 50         | 150         | 0.0286        |
| 0          | 200         | 0             |
| 0          | 200         | 0             |
| 0          | 200         | 0             |

Fig. 4b

| S. zeamais | R. dominica | R. dominica ri |
|------------|-------------|----------------|
| 20         | 0           | 0.028          |
| 20         | 0           | 7.70E-03       |
| 20         | 0           | 0.0138         |
| 20         | 0           | 0.0136         |
| 50         | 0           | 0.0185         |
| 50         | 0           | 0.0107         |
| 50         | 0           | 0.0128         |
| 50         | 0           | 0.0109         |
| 100        | 0           | 4.80E-03       |
| 100        | 0           | 0.0108         |
| 100        | 0           | 7.81E-03       |
| 100        | 0           | 6.28E-03       |
| 150        | 0           | 6.73E-03       |
| 150        | 0           | 5.94E-03       |
| 150        | 0           | 8.24E-03       |
| 150        | 0           | 7.13E-03       |
| 200        | 0           | 0.0128         |
| 200        | 0           | 4.65E-03       |
| 200        | 0           | 8.56E-03       |
| 200        | 0           | 5.36E-03       |
| 5          | 100         | 2.57E-03       |
| 10         | 100         | -3.05E-03      |
| 15         | 100         | 1.93E-03       |
| 20         | 1400        | -5.22E-03      |
| 40         | 2300        | -4.24E-03      |
| 60         | 800         | -0.0115        |
| 150        | 1200        | -2.56E-03      |
| 200        | 200         | -3.50E-03      |
| 270        | 600         | -0.0152        |
| 200        | 0           | 0              |
| 200        | 0           | 0              |
| 200        | 0           | 0              |
| 150        | 50          | -0.0358        |
| 150        | 50          | -0.0218        |
| 150        | 50          | -0.0522        |
| 100        | 100         | -0.0204        |
| 100        | 100         | -0.0241        |
| 100        | 100         | -0.024         |
| 50         | 150         | -4.77E-03      |
| 50         | 150         | -0.0271        |
| 50         | 150         | -0.0391        |
| 0          | 200         | 2.67E-03       |
| 0          | 200         | 5.19E-03       |
| 0          | 200         | 3.26E-03       |

Fig. 4c

| S. zeamais | R. dominica | S. zeamais ri |
|------------|-------------|---------------|
| 200        | 0           | -0.0232       |
| 200        | 0           | -0.0117       |
| 150        | 50          | -0.0409       |
| 150        | 50          | -0.0483       |
| 150        | 50          | -0.0326       |
| 100        | 100         | -0.0429       |
| 100        | 100         | -0.0337       |
| 100        | 100         | -0.0375       |
| 50         | 150         | -0.0522       |
| 50         | 150         | -0.0429       |
| 50         | 150         | -0.0429       |
| 20         | 0           | -0.0256       |
| 20         | 0           | -6.64E-03     |
| 20         | 0           | 0.011         |
| 20         | 0           | -0.0256       |
| 50         | 0           | -2.48E-03     |
| 50         | 0           | 2.57E-03      |
| 50         | 0           | -0.0204       |
| 50         | 0           | 0.0177        |
| 100        | 0           | -0.0281       |
| 100        | 0           | 3.17E-03      |
| 100        | 0           | -7.70E-03     |
| 100        | 0           | -0.0358       |
| 150        | 0           | -0.0168       |
| 150        | 0           | -0.0264       |
| 150        | 0           | -0.0264       |
| 150        | 0           |               |
| 200        | 0           | -0.0123       |
| 200        | 0           | -0.0589       |
| 200        | 0           | -0.0152       |
| 200        | 0           | -0.0128       |

Fig 4d

| S. zeamais | R. dominica | R. dominica ri |
|------------|-------------|----------------|
| 150        | 50          | 0.0108         |
| 150        | 50          | 5.93E-03       |
| 150        | 50          | 0.0153         |
| 100        | 100         | 9.83E-03       |
| 100        | 100         | 3.70E-03       |
| 100        | 100         | 0.0113         |
| 50         | 150         | 6.70E-03       |
| 50         | 150         | 4.29E-03       |
| 50         | 150         | 1.75E-03       |
| 0          | 200         | 5.80E-03       |
| 0          | 200         | 1.33E-03       |
| 0          | 20          | -1.17E-03      |
| 0          | 20          | 0.0142         |
| 0          | 20          | 0.011          |
| 0          | 20          | 8.24E-03       |
| 0          | 50          | 3.25E-03       |
| 0          | 50          | 8.56E-03       |
| 0          | 50          | 6.03E-03       |
| 0          | 50          | 6.28E-03       |
| 0          | 100         | 1.93E-03       |
| 0          | 100         | 3.08E-03       |
| 0          | 100         | 1.55E-03       |
| 0          | 100         | 5.29E-03       |
| 0          | 150         | 3.52E-03       |
| 0          | 150         | 4.05E-03       |
| 0          | 150         | 1.96E-03       |
| 0          | 150         | 7.86E-04       |
| 0          | 200         | 7.00E-04       |
| 0          | 200         | 1.55E-03       |
| 0          | 200         | 9.06E-04       |
| 0          | 200         | -1.68E-04      |
